# Supplementary material for: Highly oriented BN-based TIMs with high through-plane thermal conductivity and low compression modulus
Source: Royal Society of Chemistry journal article supplement (doi:10.1039/d4mh00626g), 2024-01-01
Supplement: d4mh00626g1.pdf [file d4mh00626g1.pdf]

Supplementary Information for

**Highly oriented BN-based TIMs with high through-plane thermal conductivity and low compression modulus**

Rongjie Yang <sup>a, b</sup>, Yandong Wang <sup>a</sup>, Zhenbang Zhang <sup>a</sup>, Kang Xu <sup>a</sup>, Linhong Li <sup>a, b</sup>, Yong Cao <sup>c</sup>, Maohua Li <sup>a</sup>, Jianxiang Zhang <sup>a</sup>, Yue Qin <sup>a</sup>, Boda Zhu <sup>a, b</sup>, Yingying Guo <sup>a</sup>, Yiwei Zhou <sup>a</sup>, Tao Cai <sup>a</sup>, Cheng-Te Lin <sup>a, b</sup>, Kazuhito Nishimura <sup>a</sup>, Chen Xue <sup>a, \*</sup>, Nan Jiang <sup>a, b</sup>, Jinhong Yu <sup>a, b, \*</sup>

<sup>a</sup>. Key Laboratory of Advanced Marine Materials, Ningbo Institute of Materials Technology and Engineering, Chinese Academy of Sciences, Ningbo

<sup>b</sup>. Center of Materials Science and Optoelectronics Engineering, University of Chinese Academy of Sciences, Beijing 100049, China.

<sup>c</sup>. State Key Lab of Materials Processing and Die & Mould Technology, School of Materials Science and Engineering, Huazhong University of Science and Technology, Wuhan, 430074, China.

Supplementary Figures

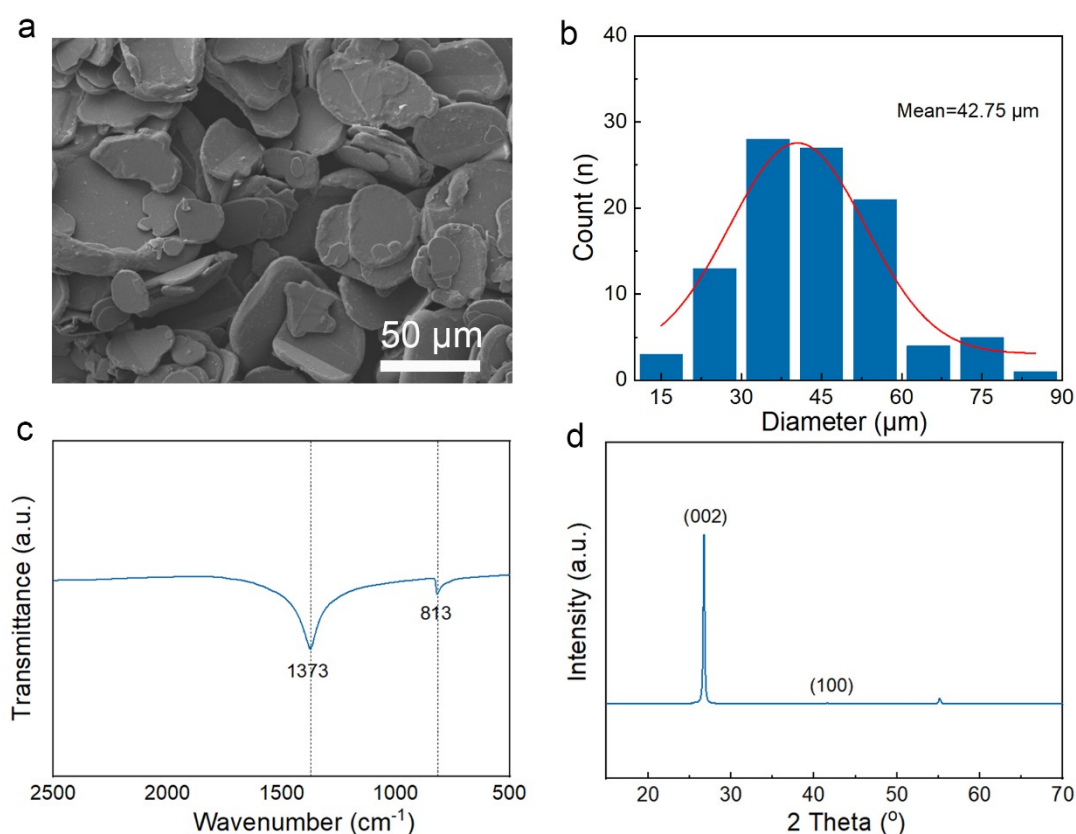

Fig. S1 (a) SEM image of h-BN (PT110). (b) Size distribution of h-BN (PT110). (c) FTIR spectra of h-BN (PT110). (d) XRD pattern of h-BN (PT110).

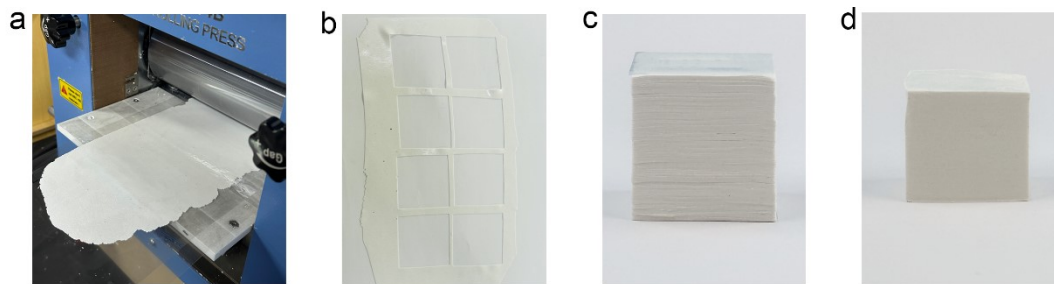

Fig. S2 (a) The process of horizontal orientation. (b) BN/PDMS film after cutting. (c) Stacked BN/PDMS film. (d) Densified BN/PDMS block.

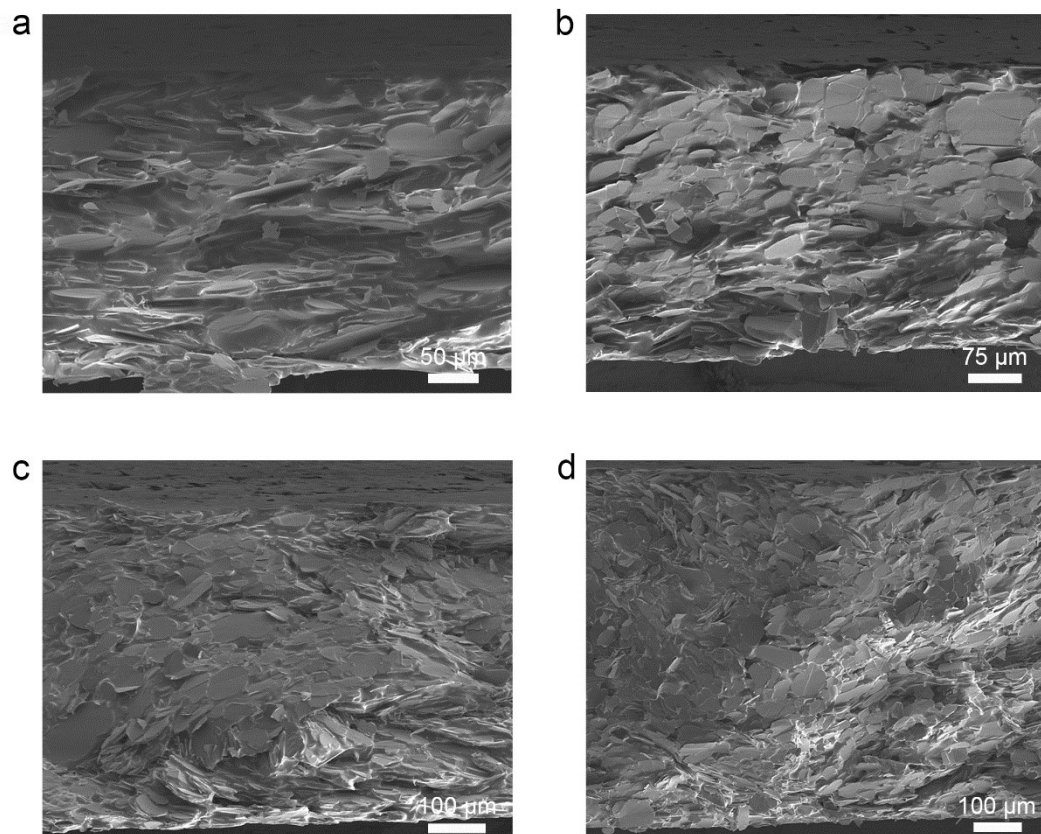

Fig. S3 (a) SEM images of BN/PDMS film with varying thicknesses (0.3, 0.4, 0.55 and 0.75 mm)

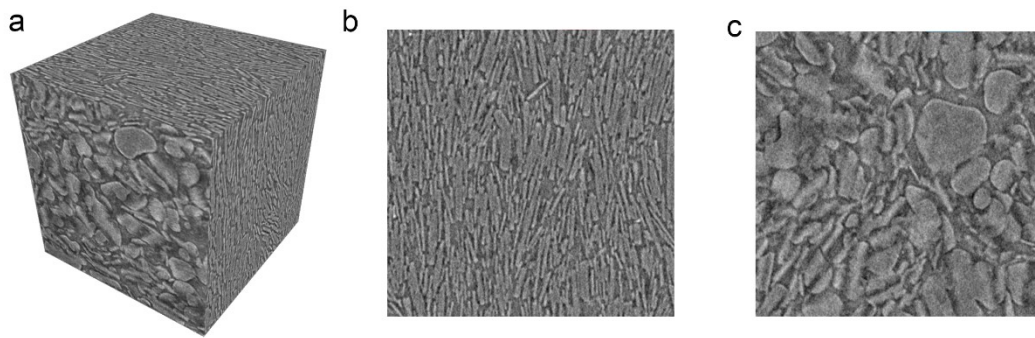

Fig. S4 (a) The original Micro-CT images of Pad-75-V. (b) Screenshot of XZ plane. (c) Screenshot of YZ plane.

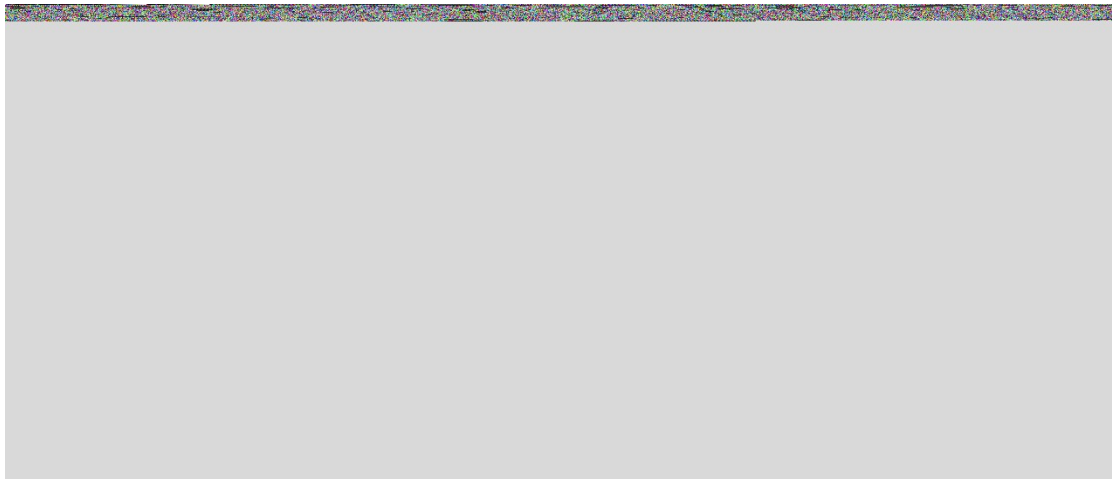

Fig. S5 (a) The azimuthal angel ( $\varphi$ ) plots of Pad-75-V. (b) The azimuthal angel ( $\varphi$ ) plots of Pad-75-R.

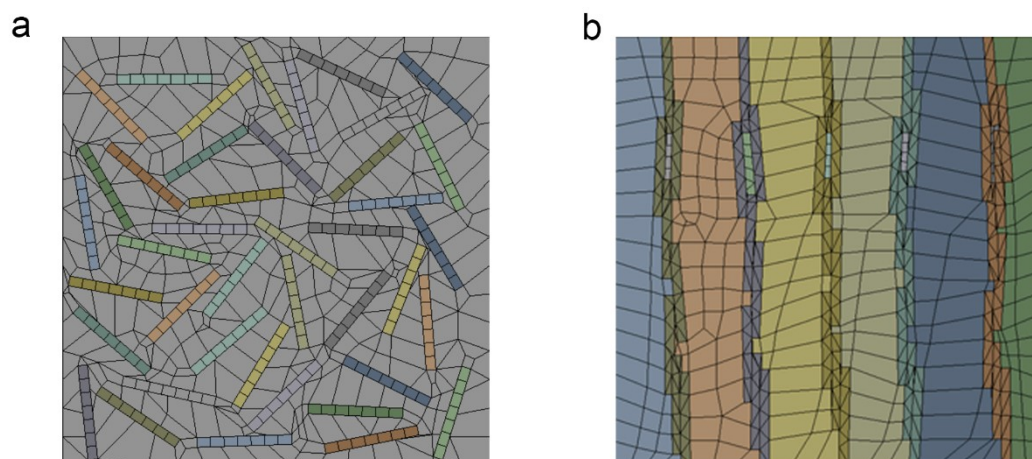

Fig. S6 The corresponding grid divisions of ANSYS models.



**Table S1** Through-plane thermal conductivity of BN/BNNS based composites

| Materials | Method           | Loading    | Through-plane TC<br>(W m <sup>-1</sup> K <sup>-1</sup> ) | References |
|-----------|------------------|------------|----------------------------------------------------------|------------|
| BN/epoxy  | Blending         | 10 wt%     | 0.57                                                     | 1          |
| BN/epoxy  | Blending         | 20 wt%     | 0.64                                                     | 2          |
| BN/epoxy  | Blending         | 30 wt%     | 1.17                                                     | 3          |
| BN/PI     | Blending         | 40 wt%     | 0.74                                                     | 4          |
| BNNS/PI   | Blending         | 40 wt%     | 0.67                                                     | 5          |
| BN/epoxy  | Magnetic field   | 50 wt%     | 3.59                                                     | 6          |
| BN/PDMS   | Micro-fluidic    | 9.85 vol%  | 6.40                                                     | 7          |
| BNNS/PDMS | Wet-spinning     | 27.05 vol% | 5.13                                                     | 8          |
| BN/MVQ    | Stacking-cutting | 54 vol%    | 6.34                                                     | 9          |
| BN/PVDF   | Pressing-cutting | 30 wt %    | 3.5                                                      | 10         |
| BN/SR     | Rolling-cutting  | 60 wt%     | 7.62                                                     | 11         |
| BN/SG     | Micro-fluidic    | 60 wt%     | 5.65                                                     | 12         |
| BN/PDMS   | Rolling-cutting  | 60 wt%     | 6.59                                                     | This work  |
| BN/PDMS   | Rolling-cutting  | 65 wt%     | 7.77                                                     | This work  |
| BN/PDMS   | Rolling-cutting  | 70 wt%     | 9.22                                                     | This work  |
| BN/PDMS   | Rolling-cutting  | 75 wt%     | 12.11                                                    | This work  |

**Table S2** Measured density, thermal diffusivity, and heat capacity of BN/PDMS composites with various BN contents with vertically aligned structure at room temperature.

| Samples  | Density<br>(g cm <sup>-3</sup> ) | Thermal diffusivity<br>(mm <sup>2</sup> s <sup>-1</sup> ) | Heat capacity<br>(J kg <sup>-1</sup> K <sup>-1</sup> ) |
|----------|----------------------------------|-----------------------------------------------------------|--------------------------------------------------------|
| Pad-60-V | 1.49                             | 3.88                                                      | 1.14                                                   |
| Pad-65-V | 1.57                             | 4.67                                                      | 1.06                                                   |
| Pad-70-V | 1.65                             | 5.48                                                      | 1.02                                                   |
| Pad-75-V | 1.70                             | 7.20                                                      | 0.99                                                   |

**Table S3** Compression modulus of reported BN/BNNS composites.

| Materials   | Through-plane TC<br>(W m <sup>-1</sup> K <sup>-1</sup> ) | Compression modulus<br>(kpa) | References |
|-------------|----------------------------------------------------------|------------------------------|------------|
| BN/PU       | 11.5                                                     | 150                          | 13         |
| LM-BN/PDMS  | 4.3                                                      | 193                          | 14         |
| GNP-BN/PDMS | 1.16                                                     | 1470                         | 15         |
| BN/PDMS     | 6.4                                                      | 2200                         | 7          |
| BN/PDMS     | 5.65                                                     | 2350                         | 12         |
| BNNS/Epoxy  | 6.07                                                     | 4000                         | 16         |
| BN/PDMS     | 12.11                                                    | 55                           | This work  |

## References

1. D. Lee, S. Lee, S. Byun, K.-W. Paik and S. H. Song, *Compos. Pt. A-Appl. Sci. Manuf.*, 2018, **107**, 217-223.
2. M. Donnay, S. Tzavalas and E. Logakis, *Compos. Sci. Technol.*, 2015, **110**, 152-158.
3. J. Hou, G. Li, N. Yang, L. Qin, M. E. Grami, Q. Zhang, N. Wang and X. Qu, *RSC Adv.*, 2014, **4**, 44282-44290.
4. N. Yang, C. Xu, J. Hou, Y. Yao, Q. Zhang, M. E. Grami, L. He, N. Wang and X. Qu, *RSC Adv.*, 2016, **6**, 18279-18287.
5. S. Zuo, Y. Lan, J. Luo, F. Zhou, L. Xu, S. Xie, X. Wei, L. Zhou, L. Ma, X. Li and C. Yin, *ACS Omega*, 2022, **7**, 43273-43282.
6. S. Xu, H. Liu, Q. Li, Q. Mu and H. Wen, *J. Mater. Chem. C*, 2016, **4**, 872-878.
7. K. Yang, X. Yang, Z. Liu, K. Li, Y. Yue, R. Zhang, F. Wang, X. Shi, J. Yuan, N. Liu, G. Wang, Z. Wang and G. Xin, *ACS Appl. Mater. Interfaces*, 2023, **15**, 28536-28545.
8. C. Lei, Y. Zhang, D. Liu, X. Xu, K. Wu and Q. Fu, *Compos. Sci. Technol.*, 2021, **214**, 108995.
9. Z. Yin, J. Guo and X. Jiang, *Compos. Sci. Technol.*, 2021, **209**, 108794.
10. Q. Song, W. Zhu, Y. Deng, F. Hai, Y. Wang and Z. Guo, *Compos. Pt. A-Appl. Sci. Manuf.*, 2019, **127**, 105654.
11. Q. Hu, X. Bai, C. Zhang, X. Zeng, Z. Huang, J. Li, J. Li and Y. Zhang, *Compos. Pt. A-Appl. Sci. Manuf.*, 2022, **152**, 106681.
12. H. Niu, H. Guo, L. Kang, L. Ren, R. Lv and S. Bai, *Nano-Micro Lett.*, 2022, **14**, 153.
13. N. Zhao, J. Li, W. Wang, W. Gao and H. Bai, *ACS Nano*, 2022, **16**, 18959-18967.
14. J. Wang, S. Wang, X. Cheng, R. Lv, Y. Luo, S. Wang, X. Liu, B. Zhou, R. Sun, Y. Liu, X. Zeng and Z. Yu, *Compos. Commun.*, 2024, **47**, 101881.
15. J. Zhang, H. Wang, T. Zhang, X. Sun, Y. Meng, C. Ma, T. Zhang, N. Lu, C. Liu and Y. Zeng, *Compos. Sci. Technol.*, 2023, **233**, 109915.
16. J. Han, G. Du, W. Gao and H. Bai, *Adv. Funct. Mater.*, 2019, **29**, 1900412.
